# Supplementary material for: Electrospun quantum dots/polymer composite porous fibers for turn-on fluorescent detection of lactate dehydrogenase
Source: Royal Society of Chemistry journal article supplement (doi:10.1039/c2jm33078d), 2012-01-01
Supplement: c2jm33078d.pdf [file c2jm33078d.pdf]

Supplementary Material (ESI) for Journal of Materials Chemistry

---

Electronic Supplementary Information (ESI) for  
**Electrospun quantum dots/polymer composite porous fibers  
for turn-on fluorescent detection of lactate dehydrogenase**

**Xiaolong He,<sup>a,b,Δ</sup> Longfei Tan,<sup>a,Δ</sup> Xiaoli Wu,<sup>a,b</sup> Chuanmiao Yan,<sup>a,b</sup> Dong Chen,<sup>a</sup>  
Xianwei Meng,<sup>\*a</sup> and Fangqiong Tang<sup>\*a</sup>**

<sup>a</sup> *Laboratory of Controllable Preparation and Application of Nanomaterials, Technical Institute of Physics and Chemistry, Chinese Academy of Sciences, Beijing 100190, People's Republic of China.*

<sup>b</sup> *Graduate University of the Chinese Academy of Sciences, Beijing 100049, People's Republic of China.*

<sup>Δ</sup> *These authors contributed equally to this paper.*

\* To whom correspondence should be addressed. Fax: +86-10-62554670, Tel: +86-10-82543521. E-mail: tangfq@mail.ipc.ac.cn

## Supplementary Material (ESI) for Journal of Materials Chemistry

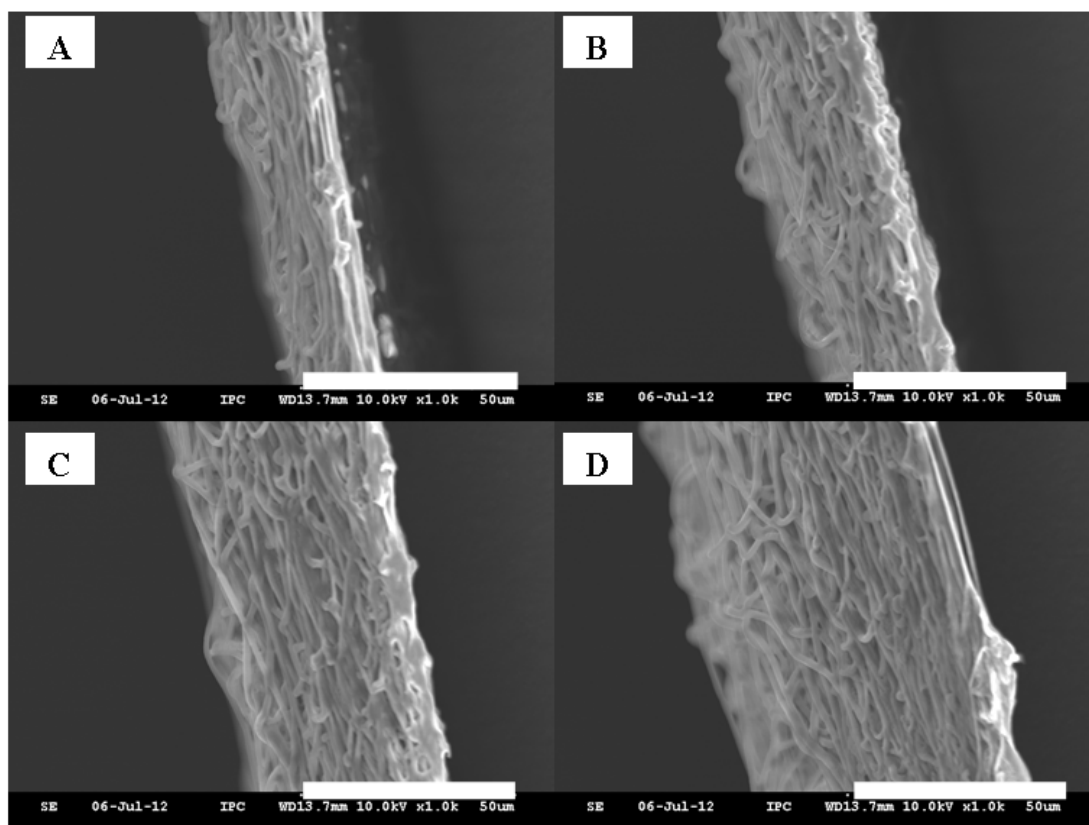

**Fig. S1** SEM images of cross sections of fibrous films with different electrospinning time for (A) 2 min; (B) 4 min; (C) 6 min; (D) 8 min. The bars are 50  $\mu\text{m}$ .

## Supplementary Material (ESI) for Journal of Materials Chemistry

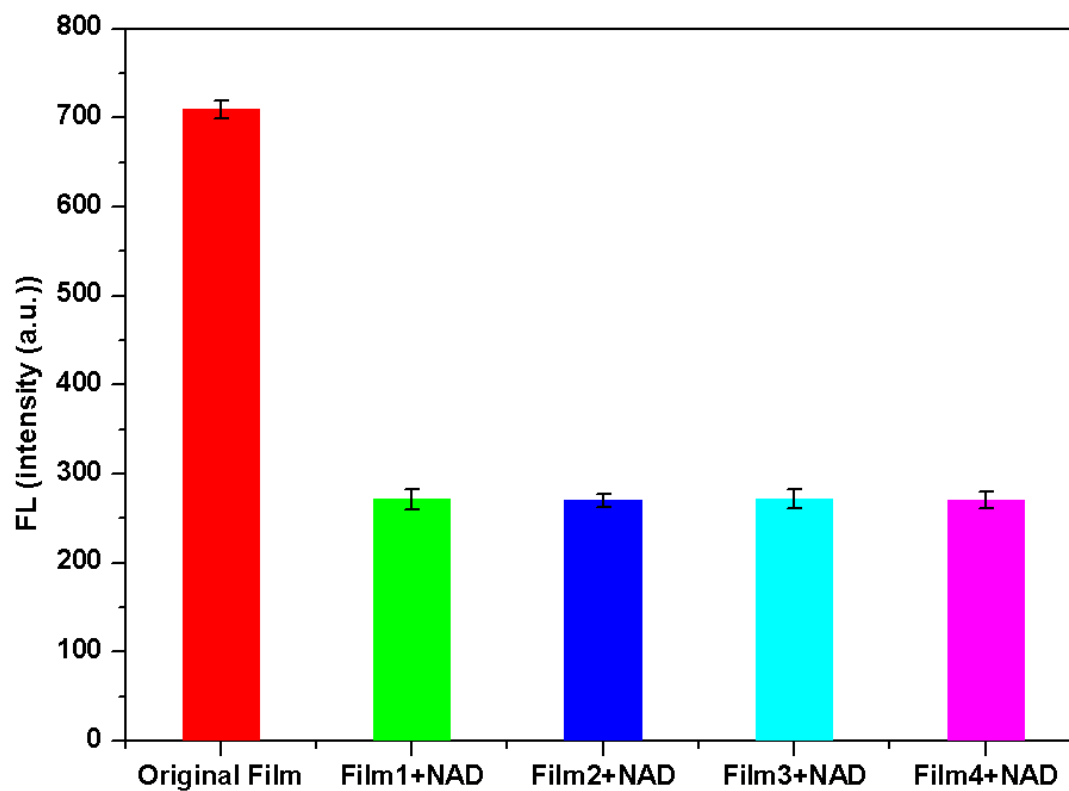

**Fig. S2** The fluorescence changes of TX-45-treated electrospun fibrous films alone and films from four batches in the presence of NAD (5mM).
